# Supplementary material for: Risk Assessment and Implication of Human Exposure to Road Dust Heavy Metals in Jeddah, Saudi Arabia
Source: MDPI journal article supplement (doi:10.3390/ijerph15010036), 2017-12-26
Supplement: s1 [file s1]

# Supplementary Materials: Risk Assessment and Implication of Human Exposure to Road Dust Heavy Metals in Jeddah, Saudi Arabia

Ibrahim I. Shabbaj, Mansour A. Alghamdi \*, Magdy Shamy, Salwa K. Hassan, Musaab M. Alsharif and Mamdouh I. Khoder

**Table S1.** Certified and measured values and recovery [ $C(\text{element, measured})/C(\text{element, certified}) \times 100, \%$ ] of each tested element in certified reference material for the present study.

| Elements | NIST 2710                   |                            |              |
|----------|-----------------------------|----------------------------|--------------|
|          | Certified Values<br>(mg/kg) | Measured Values<br>(mg/kg) | Recovery (%) |
| Mn       | 1.01                        | 0.97                       | 95.60        |
| As       | 626.00                      | 599.08                     | 95.70        |
| Fe       | 3.38                        | 3.06                       | 90.50        |
| Cd       | 21.80                       | 19.97                      | 91.60        |
| Co       | 10.00                       | 8.27                       | 82.70        |
| Cr       | 39.00                       | 28.55                      | 73.20        |
| Cu       | 2950.00                     | 2303.95                    | 78.10        |
| Ni       | 14.30                       | 14.10                      | 98.60        |
| Pb       | 5532.00                     | 5692.43                    | 102.90       |
| Zn       | 6952.00                     | 6896.38                    | 99.20        |
| V        | 76.60                       | 72.00                      | 94.00        |

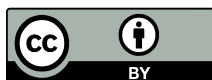

© 2017 by the authors; licensee MDPI, Basel, Switzerland. This article is an open access article distributed under the terms and conditions of the Creative Commons by Attribution (CC-BY) license (<http://creativecommons.org/licenses/by/4.0/>).
